# Supplementary material for: Tumor Molecular Profiling for an Individualized Approach to the Treatment of Hepatocellular Carcinoma: A Patient Case Study
Source: MDPI journal article supplement (doi:10.3390/biomedicines6020046), 2018-04-17

## 2013 CARE Checklist

1. **Title** – The area of focus and “case report” should appear in the title ✓
2. **Key Words** – Two to five key words that identify topics in this case report ✓
3. **Abstract** – (structure or unstructured)
  - a. Introduction – What is unique and why is it important? ✓
  - b. The patient’s main concerns and important clinical findings. ✓
  - c. The main diagnoses, interventions, and outcomes. ✓
  - d. Conclusion—What are one or more “take-away” lessons? ✓
4. **Introduction** – Briefly summarize why this case is unique with medical literature references. ✓
5. **Patient Information**
  - a. De-identified demographic and other patient information. ✓
  - b. Main concerns and symptoms of the patient. ✓
  - c. Medical, family, and psychosocial history including genetic information. ✓
  - d. Relevant past interventions and their outcomes. ✓
6. **Clinical Findings** – Relevant physical examination (PE) and other clinical findings. ✓
7. **Timeline** – Relevant data from this episode of care organized as a timeline (figure or table). ✓
8. **Diagnostic Assessment**
  - a. Diagnostic methods (PE, laboratory testing, imaging, surveys). ✓
  - b. Diagnostic challenges. ✓
  - c. Diagnostic reasoning including differential diagnosis. ✓
  - d. Prognostic characteristics when applicable. ✓
9. **Therapeutic Intervention**
  - a. Types of intervention (pharmacologic, surgical, preventive). ✓
  - b. Administration of intervention (dosage, strength, duration). ✓
  - c. Changes in the interventions with explanations. ✓
10. **Follow-up and Outcomes**
  - a. Clinician and patient-assessed outcomes when appropriate. ✓
  - b. Important follow-up diagnostic and other test results. ✓
  - c. Intervention adherence and tolerability (how was this assessed)? ✓

- d. Adverse and unanticipated events. ✓
- 11. **Discussion**
  - a. Strengths and limitations in your approach to this case. ✓
  - b. Discussion of the relevant medical literature. ✓
  - c. The rationale for your conclusions. ✓
  - d. The primary “take-away” lessons from this case report. ✓
- 12. **Patient Perspective** – The patient can share their perspective on their case. ✓
- 13. **Informed Consent** – The patient should give informed consent. ✓

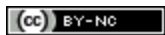

Supplement: s1 [file s1]
